# Supplementary material
Source: MDPI journal article supplement (https://www.mdpi.com/2073-445X/10/6/608)

Table S1 Accuracy assessment of land use classification of five capitals in 2009

Table S2 Accuracy assessment of land use classification of five capitals in 2019

Table S3 The neighborhood weights for six land use types in five capitals

Table S4 Conversion cost matrix of land use pairs under three scenarios

Table S5 Two uncertainties in estimating carbon storage impacts of future land use change

Fig.S1. The used training samples in interpreting land use in GEE

Table S1 Accuracy assessment of land use classification in 2009. Note: The overall accuracies of land use classification of Ashkhabad, Bishkek, Dushanbe, Nur Sultan, and Tashkent are 92%, 89.7%, 92.7%, 92%, and 91.7%, respectively.

| Capitals            | Classified Data | Reference data |             |        |          |           |       | User's Accuracy | Producer's Accuracy |
|---------------------|-----------------|----------------|-------------|--------|----------|-----------|-------|-----------------|---------------------|
|                     |                 | Built-up land  | Unused land | Forest | Cropland | Grassland | Water |                 |                     |
| Ashkhabad<br>(92%)  | Built-up land   | 46             | 3           | 0      | 3        | 1         | 0     | 86.8%           | 100.0%              |
|                     | Unused land     | 0              | 152         | 0      | 0        | 4         | 0     | 97.4%           | 96.2%               |
|                     | Forest          | 0              | 0           | 1      | 0        | 0         | 0     | 100.0%          | 33.3%               |
|                     | Cropland        | 0              | 2           | 2      | 60       | 5         | 0     | 87.0%           | 93.8%               |
|                     | Grassland       | 0              | 1           | 0      | 1        | 15        | 0     | 88.2%           | 55.6%               |
|                     | Water           | 0              | 0           | 0      | 0        | 2         | 2     | 50.0%           | 100.0%              |
| Bishkek<br>(89.7%)  | Built-up land   | 34             | 5           | 0      | 1        | 2         | 0     | 81.0%           | 97.1%               |
|                     | Unused land     | 0              | 47          | 2      | 4        | 0         | 0     | 88.7%           | 81.0%               |
|                     | Forest          | 1              | 0           | 7      | 0        | 0         | 0     | 87.5%           | 50.0%               |
|                     | Cropland        | 0              | 6           | 3      | 158      | 3         | 0     | 92.9%           | 95.8%               |
|                     | Grassland       | 0              | 0           | 0      | 0        | 5         | 0     | 100.0%          | 50.0%               |
|                     | Water           | 0              | 0           | 2      | 2        | 0         | 18    | 81.8%           | 100.0%              |
| Dushanbe<br>(92.7%) | Built-up land   | 38             | 3           | 1      | 1        | 2         | 0     | 84.4%           | 97.4%               |
|                     | Unused land     | 0              | 134         | 0      | 0        | 2         | 0     | 98.5%           | 93.7%               |
|                     | Forest          | 0              | 0           | 2      | 0        | 0         | 0     | 100.0%          | 66.7%               |
|                     | Cropland        | 0              | 3           | 0      | 69       | 2         | 0     | 93.2%           | 98.6%               |
|                     | Grassland       | 0              | 3           | 0      | 0        | 32        | 0     | 91.4%           | 84.2%               |
|                     | Water           | 1              | 0           | 0      | 0        | 0         | 3     | 75.0%           | 100.0%              |
| Nur Sultan<br>(92%) | Built-up land   | 28             | 7           | 0      | 0        | 0         | 2     | 75.7%           | 100.0%              |
|                     | Unused land     | 0              | 73          | 0      | 0        | 1         | 0     | 98.6%           | 84.9%               |
|                     | Forest          | 0              | 0           | 0      | 0        | 0         | 0     | 0.0%            | 0.0%                |
|                     | Cropland        | 0              | 4           | 0      | 108      | 8         | 0     | 90.0%           | 100.0%              |
|                     | Grassland       | 0              | 2           | 0      | 0        | 60        | 0     | 96.8%           | 87.0%               |
|                     | Water           | 0              | 0           | 0      | 0        | 0         | 7     | 100.0%          | 77.8%               |
| Tashkent<br>(91.7%) | Built-up land   | 121            | 5           | 1      | 2        | 0         | 0     | 93.8%           | 96.0%               |
|                     | Unused land     | 0              | 7           | 0      | 1        | 0         | 0     | 87.5%           | 53.8%               |
|                     | Forest          | 0              | 0           | 8      | 1        | 0         | 0     | 88.9%           | 80.0%               |
|                     | Cropland        | 5              | 0           | 0      | 133      | 4         | 0     | 93.7%           | 95.7%               |
|                     | Grassland       | 0              | 1           | 0      | 1        | 2         | 0     | 50.0%           | 25.0%               |
|                     | Water           | 0              | 0           | 1      | 1        | 2         | 4     | 50.0%           | 100.0%              |

Table S2 Accuracy assessment of land use classification in 2019. Note: The overall accuracies of land use classification of Ashkhabad, Bishkek, Dushanbe, Nur Sultan, and Tashkent are 91.7%, 93.3%, 92.3%, 90.3%, and 90.7%, respectively.

| Capitals              | Classified Data | Reference data |             |        |          |           |       | User's Accuracy | Producer's Accuracy |
|-----------------------|-----------------|----------------|-------------|--------|----------|-----------|-------|-----------------|---------------------|
|                       |                 | Built-up land  | Unused land | Forest | Cropland | Grassland | Water |                 |                     |
| Ashkhabad<br>(91.7%)  | Built-up land   | 54             | 4           | 0      | 4        | 1         | 0     | 85.7%           | 98.2%               |
|                       | Unused land     | 0              | 155         | 0      | 0        | 5         | 0     | 96.9%           | 94.5%               |
|                       | Forest          | 0              | 0           | 1      | 0        | 0         | 0     | 100.0%          | 100.0%              |
|                       | Cropland        | 1              | 4           | 0      | 53       | 4         | 0     | 85.5%           | 93.0%               |
|                       | Grassland       | 0              | 1           | 0      | 0        | 9         | 0     | 90.0%           | 45.0%               |
|                       | Water           | 0              | 0           | 0      | 0        | 1         | 3     | 75.0%           | 100.0%              |
| Bishkek<br>(93.3%)    | Built-up land   | 63             | 2           | 2      | 0        | 0         | 0     | 94.0%           | 98.4%               |
|                       | Unused land     | 0              | 59          | 0      | 3        | 1         | 0     | 93.7%           | 85.5%               |
|                       | Forest          | 0              | 0           | 0      | 0        | 0         | 0     | 0.0%            | 0.0%                |
|                       | Cropland        | 1              | 7           | 1      | 137      | 0         | 0     | 93.8%           | 96.5%               |
|                       | Grassland       | 0              | 1           | 0      | 2        | 11        | 0     | 78.6%           | 91.7%               |
|                       | Water           | 0              | 0           | 0      | 0        | 0         | 10    | 100.0%          | 100.0%              |
| Dushanbe<br>(92.3%)   | Built-up land   | 75             | 1           | 0      | 0        | 0         | 0     | 98.7%           | 98.7%               |
|                       | Unused land     | 0              | 105         | 0      | 1        | 9         | 0     | 91.3%           | 91.3%               |
|                       | Forest          | 0              | 0           | 2      | 0        | 0         | 0     | 100.0%          | 100.0%              |
|                       | Cropland        | 0              | 5           | 0      | 49       | 1         | 0     | 89.1%           | 96.1%               |
|                       | Grassland       | 0              | 4           | 0      | 1        | 43        | 0     | 89.6%           | 81.1%               |
|                       | Water           | 1              | 0           | 0      | 0        | 0         | 3     | 75.0%           | 100.0%              |
| Nur Sultan<br>(90.3%) | Built-up land   | 47             | 4           | 1      | 0        | 2         | 0     | 87.0%           | 97.9%               |
|                       | Unused land     | 1              | 25          | 0      | 0        | 0         | 0     | 96.2%           | 61.0%               |
|                       | Forest          | 0              | 0           | 7      | 1        | 0         | 0     | 87.5%           | 87.5%               |
|                       | Cropland        | 0              | 9           | 0      | 98       | 4         | 0     | 88.3%           | 98.0%               |
|                       | Grassland       | 0              | 2           | 0      | 1        | 65        | 3     | 91.5%           | 91.5%               |
|                       | Water           | 0              | 1           | 0      | 0        | 0         | 29    | 96.7%           | 90.6%               |
| Tashkent<br>(90.7%)   | Built-up land   | 158            | 3           | 1      | 16       | 1         | 0     | 88.3%           | 100.0%              |
|                       | Unused land     | 0              | 3           | 0      | 0        | 0         | 0     | 100.0%          | 50.0%               |
|                       | Forest          | 0              | 0           | 6      | 0        | 0         | 0     | 100.0%          | 66.7%               |
|                       | Cropland        | 0              | 0           | 2      | 94       | 4         | 0     | 94.0%           | 84.7%               |
|                       | Grassland       | 0              | 0           | 0      | 0        | 2         | 0     | 100.0%          | 28.6%               |
|                       | Water           | 0              | 0           | 0      | 1        | 0         | 9     | 90.0%           | 100.0%              |

Table S3 The neighborhood weights for six land use types in five capitals

| Capitals   | Built-up land | Unused land | Forest | Cropland | Grassland | Water |
|------------|---------------|-------------|--------|----------|-----------|-------|
| Ashkhabad  | 0.75          | 0.5         | 0.1    | 0.5      | 0.25      | 0.1   |
| Bishkek    | 0.75          | 0.1         | 0.4    | 0.75     | 0.25      | 0.25  |
| Dushanbe   | 0.75          | 0.1         | 0.4    | 0.75     | 0.5       | 0.25  |
| Nur Sultan | 0.75          | 0.25        | 0.4    | 0.75     | 0.5       | 0.4   |
| Tashkent   | 0.75          | 0.25        | 0.25   | 0.25     | 0.1       | 0.25  |

Table S4 Conversion cost matrix of land use pairs under three scenarios

| Scenario | Land use type | Built-up<br>land | Unused land | Forest | Cropland | Grassland | Water |
|----------|---------------|------------------|-------------|--------|----------|-----------|-------|
| BDS      | Built-up land | 1                | 1           | 1      | 1        | 1         | 1     |
|          | Unused land   | 1                | 1           | 1      | 1        | 1         | 1     |
|          | Forest        | 1                | 1           | 1      | 1        | 1         | 1     |
|          | Grassland     | 1                | 1           | 1      | 1        | 1         | 1     |
|          | Water         | 1                | 1           | 1      | 1        | 1         | 1     |
| CPS      | Built-up land | 1                | 1           | 1      | 1        | 1         | 1     |
|          | Unused land   | 1                | 1           | 1      | 1        | 1         | 1     |
|          | Forest        | 1                | 1           | 1      | 1        | 1         | 1     |
|          | Grassland     | 1                | 1           | 1      | 1        | 1         | 1     |
|          | Water         | 1                | 1           | 1      | 1        | 1         | 1     |
| EPS      | Built-up land | 1                | 1           | 1      | 1        | 1         | 1     |
|          | Unused land   | 1                | 1           | 1      | 1        | 1         | 1     |
|          | Forest        | 1                | 1           | 1      | 1        | 1         | 1     |
|          | Grassland     | 1                | 1           | 1      | 1        | 1         | 1     |
|          | Water         | 0                | 0           | 0      | 0        | 0         | 1     |

Table S5 Two scenarios of uncertainty in estimating carbon storage impact of future land use change (Tg). Note: A and B refers to using carbon densities of built-up land and unused land (0-3m) from Li et al. (2015) to estimate uncertainties of carbon storage change, respectively.

|          | Capitals   | 2019  | BDS            |        | CPS            |        | EPS            |        |
|----------|------------|-------|----------------|--------|----------------|--------|----------------|--------|
|          |            |       | Carbon storage | Change | Carbon storage | Change | Carbon storage | Change |
| <b>A</b> | Ashkhabad  | 13.27 | 14.57          | 1.29   | 13.91          | 0.64   | 14.62          | 1.34   |
|          | Bishkek    | 14.95 | 16.26          | 1.31   | 15.53          | 0.58   | 16.05          | 1.10   |
|          | Dushanbe   | 13.45 | 15.28          | 1.83   | 14.32          | 0.87   | 14.90          | 1.45   |
|          | Nur Sultan | 14.16 | 15.06          | 0.91   | 14.86          | 0.70   | 14.68          | 0.52   |
|          | Tashkent   | 20.92 | 22.63          | 1.71   | 21.12          | 0.20   | 22.60          | 1.68   |
|          | Capitals   | 2019  | BDS            |        | CPS            |        | EPS            |        |
|          |            |       | Carbon storage | Change | Carbon storage | Change | Carbon storage | Change |
| <b>B</b> | Ashkhabad  | 10.86 | 10.31          | -0.55  | 10.60          | -0.26  | 10.43          | -0.43  |
|          | Bishkek    | 8.40  | 7.61           | -0.79  | 7.90           | -0.50  | 7.67           | -0.73  |
|          | Dushanbe   | 9.62  | 8.74           | -0.88  | 9.10           | -0.52  | 8.75           | -0.87  |
|          | Nur Sultan | 8.12  | 7.66           | -0.46  | 7.68           | -0.44  | 8.02           | -0.10  |
|          | Tashkent   | 3.74  | 2.66           | -1.08  | 3.32           | -0.42  | 3.01           | -0.73  |

Fig.S1. The used training samples in interpreting land use in GEE. Notes: The images within study areas are raw images. The training samples were defined from December 2th, 2019 to December 10th, 2019.

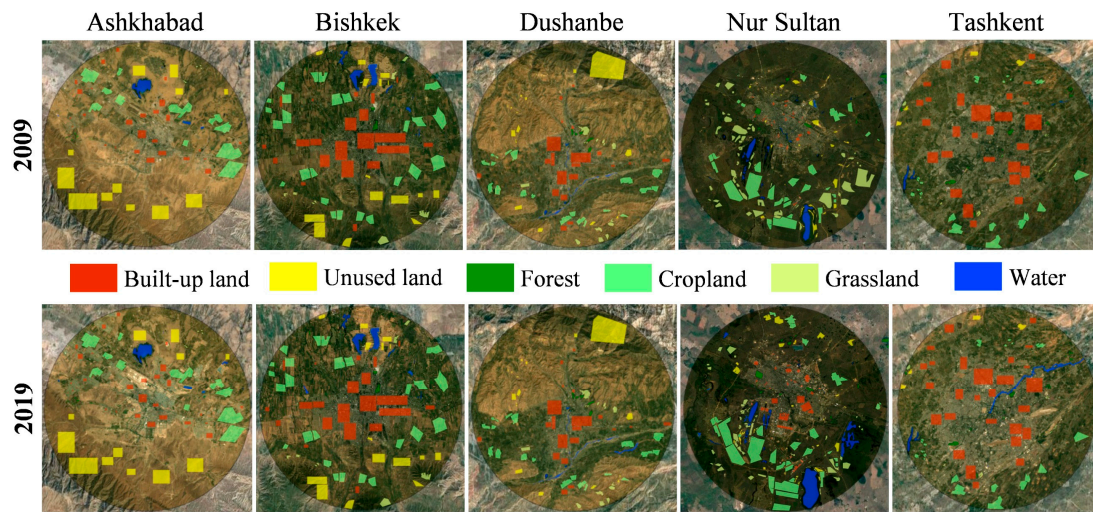

Supplement: s1 [file s1]
